# Supplementary material
Source: PubMed Central journal article supplement (PMC3986350)
Supplement: NIHMS529638-supplement-Supp_Fig_S1-S2.pdf [file NIHMS529638-supplement-Supp_Fig_S1-S2.pdf]

## Supplementary Online Material

**Babushok et al.** Single Nucleotide Polymorphism Array Analysis of Bone Marrow Failure Patients Reveals Characteristic Patterns of Genetic Changes

**Corresponding Author:** Daria Babushok; Email: [daria.babushok@uphs.upenn.edu](mailto:daria.babushok@uphs.upenn.edu)

### Contents:

Page 1: Table of Contents

Page 2. Supplemental Methods (CN-LOH Prediction)

Page 2. Supplemental Text 1A (Case Descriptions)

Page 3. Supplemental Text 1B, Supplemental Text 1C (Case Descriptions)

Page 5. Supplemental Figure 1. Expansion of Monosomy 21 Clone Causing *RUNX1* Haploinsufficiency in a Patient with Congenital Thrombocytopenia and Congenital Anomalies.

Page 6: Supplemental Figure 1 Caption

Page 7: Supplemental Figure 2. Flow Diagram for Candidate Gene Analysis.

Page 7: Supplemental Figure 2 Caption

Page 8. Supplemental References

### **Supplemental Methods: CN-LOH Prediction**

For detection of CN-LOH, we used the CN-LOH prediction algorithm available as part of the CNV Workshop<sup>1</sup> (Available for download at <http://cnv.sourceforge.net>). Following CN-LOH prediction, we used initial thresholds of a minimum of 100 homozygous SNPs and 1MB size to identify a high-confidence set of CN-LOH regions. In order to focus on CN-LOH regions most likely to be pathogenic, we analyzed CN-LOH regions exceeding the 99<sup>th</sup> percentile of CN-LOH size of normal controls. For the Quad610 Beadchip, 99<sup>th</sup> percentile of CN-LOH size in the control population was 5.3 MB (median 1.3MB). For Omni1-Quad Beadchip, 99<sup>th</sup> percentile was 8.5 MB (median 1.3 MB). All genomic positions were based on National Center for Biotechnology Information Build 37 of the human genome (hg19) from the University of California-Santa Cruz genome browser.

### **Supplemental Text: Case Descriptions**

#### **Supplemental Text 1A**

Patient 1 was a 27 year old female with a ten-year history of severe aplastic anemia, with a small PNH clone. Metaphase cytogenetics showed inversion 9p13q21.1, a normal population variant. SNP-A performed for routine follow-up at the time of remission was unremarkable. However, SNP-A obtained two years later in the setting of a relapse revealed a new acquired CN-LOH clone at 5q (Figure 1B). The 5q CN-LOH clone persisted at 6 month follow-up (not shown).

Patient 3 was a 47 year old male with a new diagnosis of aplastic anemia, with a small PNH clone. Metaphase cytogenetics were normal. SNP-A at the time of diagnosis revealed multiple acquired CN-LOH clones involving both 6p and 6q. SNP-A performed after one course immunosuppressive therapy showed a loss of the 6q CN-LOH and an expansion of the 6p CN-LOH clone (Figure 1C).

**Supplemental Text 1B**

Patient 14 was a 6 year old Caucasian female, referred for a life-long history of “Shwachman-like” bone marrow failure syndrome, with negative *SBDS* gene testing. The patient initially presented in infancy with failure to thrive, a history of pancreatic insufficiency that improved with pancreatic enzyme supplementation, and neutropenia. Additional symptoms included a hypogammaglobulinemia, a seizure disorder and skin changes. *SBDS* gene testing was negative, *ELA1* and *HAX1* testing was negative. Telomere length testing did not meet diagnostic criteria for Dyskeratosis Congenita. She was managed with G-CSF and IVIG infusions. Bone marrow biopsy at the time of referral showed a hypocellular marrow with 25% cellularity, M:E ratio of 2:1, and trilineage hematopoiesis without overt dysplasia or increase in blasts. Metaphase cytogenetics were normal. SNP array performed on the bone marrow aspirate revealed a clonal gain of chromosome 13 in 5-10% of cells. SNP array findings were confirmed by FISH with probes for the *RB1* and *FOXO1* loci on chromosome 13q14. Trisomy 13 has been previously described in the context of myelodysplasia, myeloproliferative disorders, and acute myeloid leukemias<sup>2-4</sup>.

**Supplemental Text 1C**

Patient 13 was a 1 year old Southeast Asian male, referred for congenital thrombocytopenia. The patient had intrauterine growth retardation and multiple congenital anomalies at birth including the middle interhemispheric variant of holoprocencephaly, bilateral ptosis, pyloric stenosis, and kyphosis of thoracic spine. Karyotype performed on skin biopsy at birth revealed a constitutional chromosomal abnormality of 46,XY,r(21)[17]/45,XY,-21[3]; SNP array performed on the same specimen showed that a 10.21 Mb deletion of 21q22.13q22.3 in the cell line containing the ring chromosome. A bone marrow biopsy performed at 1 year of age to evaluate persistent thrombocytopenia showed a cellular marrow with trilineage hematopoiesis without dyspoiesis. Bone marrow cytogenetic analysis showed an abnormal karyotype 46,XY,r(21)[1]/45,XY,-21[19]. SNP array analysis on the bone marrow aspirate

revealed an expansion of the monosomy 21 clone (85%) with ring 21 comprising only 15%; this was in contrast to the constitutional SNP array sample showing 85% with ring 21 and 15% with monosomy 21. The expansion of the monosomy 21 clone resulted in haploinsufficiency for *RUNX1*; heterozygous loss of *RUNX1* was previously shown to cause congenital thrombocytopenia<sup>5-6</sup>. Monosomy 21 has been seen in isolated cases of myeloid malignancies<sup>7-8</sup> and lymphomas<sup>7,9-10</sup>; and was reported in a case of constitutional mosaic ring 21<sup>11</sup>.

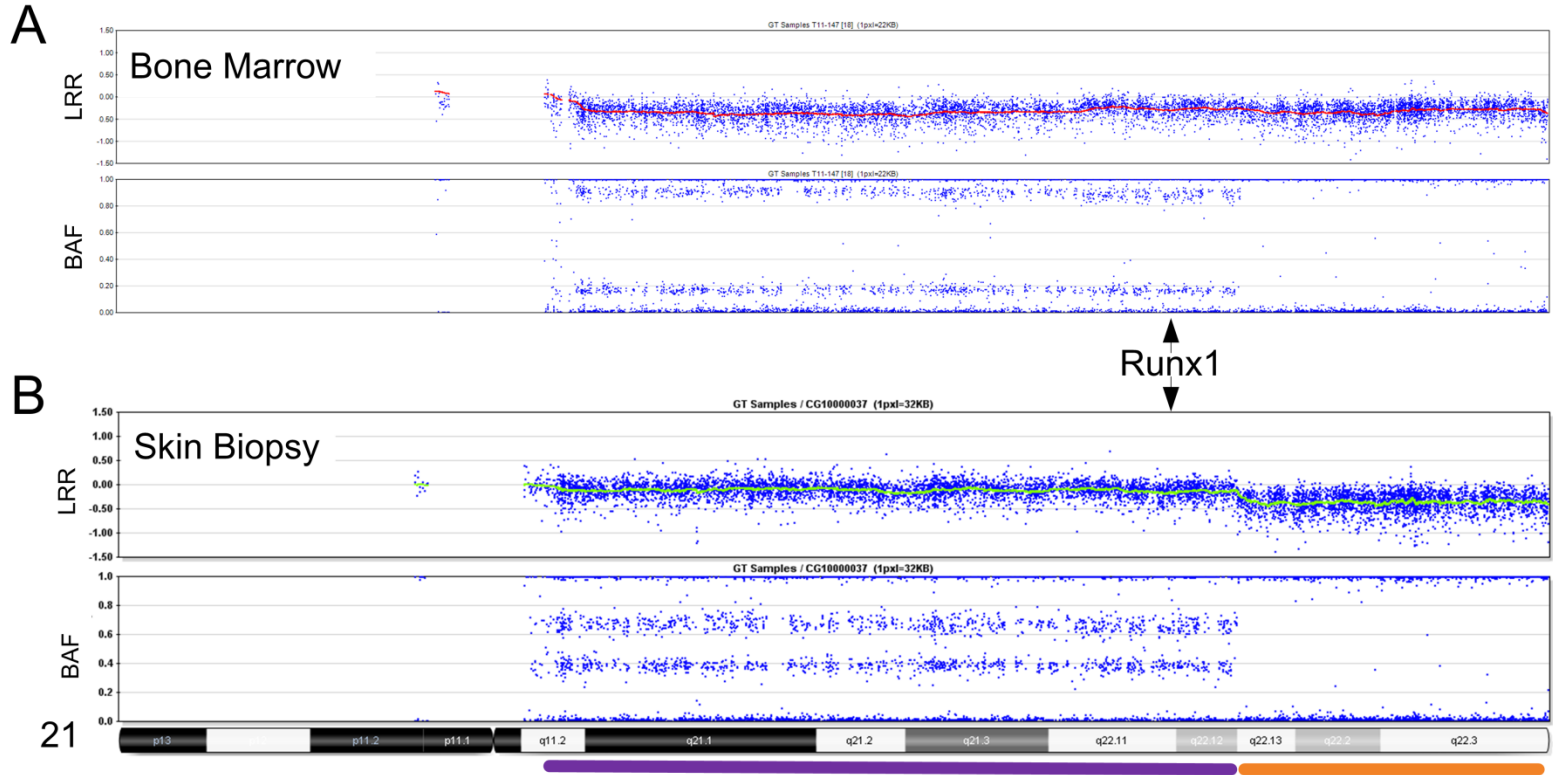

**Supplemental Figure 1: Expansion of Monosomy 21 Clone Causing *RUNX1* Haploinsufficiency in a Patient with Congenital Thrombocytopenia and Congenital Anomalies.**

**Supplemental Figure 1: Expansion of Monosomy 21 Clone Causing *RUNX1* Haploinsufficiency in a Patient with Congenital Thrombocytopenia and Congenital Anomalies.** Panel A shows SNP-A genotyping of bone marrow aspirate DNA from a 1-year old male with congenital thrombocytopenia and multiple anomalies. Genotyping results are depicted as two scatter plots: the top plot shows Log R Ratio (LRR, a measure of normalized total signal intensity for both alleles) on the Y-axis, and the chromosomal location on the X-axis. The bottom plot of each pair shows B-allele Frequency (BAF, a relative frequency of the minor allele) on the Y-axis, and the chromosomal location on the X-axis. Panel A shows a dominant clone of monosomy 21, seen as a prominent negative deflection of LRR from a normal diploid value of 0 in the region indicated by the purple line. There is a smaller, roughly 15% clone of ring chromosome 21 containing a terminal deletion (region highlighted by orange line). Panel B shows a paired SNP array obtained on DNA extracted from a skin biopsy from the same patient. Skin biopsy SNP-A reveals constitutional mosaicism for ring chromosome 21 estimated at roughly 85% and containing a terminal deletion of chromosome 21 (indicated by the orange line); there is a smaller monosomy 21 clone (15%) seen as a slight negative deflection of LRR in the region indicated by purple line. In conjunction, results of Panels A and B indicate an expansion of the monosomy 21 clone in the bone marrow compared to the skin in this patient with congenital somatic mosaicism for ring chromosome 21 and monosomy 21. Expansion of monosomy 21 leads to effective haploinsufficiency for *RUNX1*, which has been previously linked to congenital thrombocytopenia.

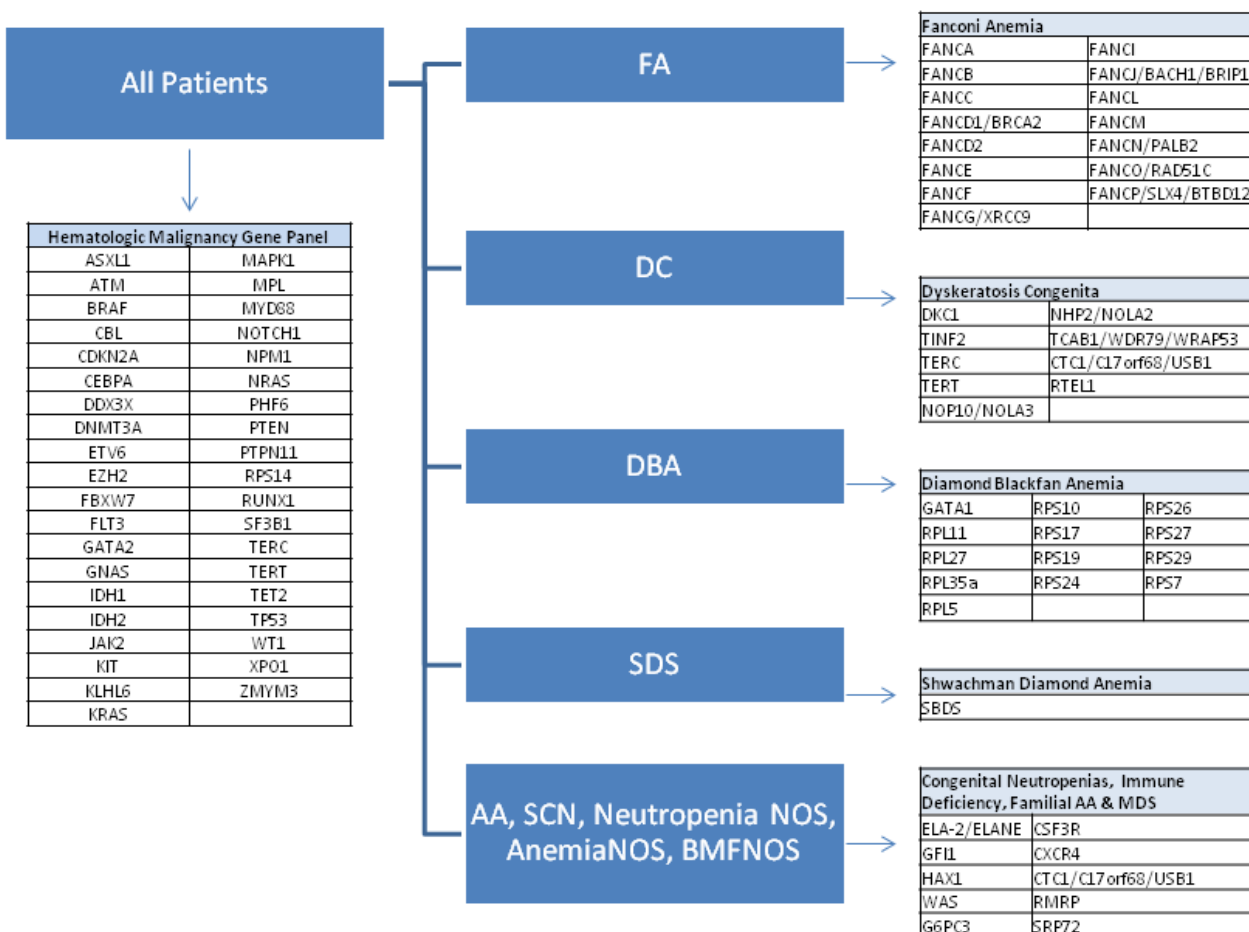

**Supplemental Figure 2: Flow Diagram for Candidate Gene Analysis.** SNP-A for all patients were visually analyzed in GenomeStudio Software for presence of abnormalities candidate genes listed on the left of the slide (“Hematologic Malignancy Gene Panel”). Additionally, patients from selected diagnostic groups (shown in blue rectangles) were screened for structural abnormalities in additional candidate genes as shown.

## Supplemental References

1. Gai X, Perin JC, Murphy K, et al. CNV Workshop: an integrated platform for high-throughput copy number variation discovery and clinical diagnostics. *BMC Bioinformatics* 2010;11:74.
2. Mark HF. Trisomy 13 in the myelodysplastic syndromes and acute leukemia. *Cancer Genet Cytogenet* 1996;87:92.
3. Dohner H, Arthur DC, Ball ED, et al. Trisomy 13: a new recurring chromosome abnormality in acute leukemia. *Blood* 1990;76:1614-21.
4. Cabrol C, Samii K, Scherrer A, Darbellay R, Beris P. Trisomy 13 in a Philadelphia negative chromosome and BCR-ABL negative myeloproliferative disorder. *Cancer Genet Cytogenet* 1999;111:184-5.
5. van der Crabben S, van Binsbergen E, Ausems M, Poot M, Bierings M, Buijs A. Constitutional RUNX1 deletion presenting as non-syndromic thrombocytopenia with myelodysplasia: 21q22 ITS1 as a candidate gene in mental retardation. *Leuk Res* 2010;34:e8-12.
6. Walker LC, Stevens J, Campbell H, et al. A novel inherited mutation of the transcription factor RUNX1 causes thrombocytopenia and may predispose to acute myeloid leukaemia. *Br J Haematol* 2002;117:878-81.
7. Chang JJ, Liu CJ, Liu JH, Chiou TJ, Tzeng CH, Chen PM. Monosomy 21 in two patients with acute nonlymphocytic leukemia. *Cancer Genet Cytogenet* 1992;61:122-5.
8. Freitas PC, Carvalho-Salles AB, Mendiburu CF, Ricci O, Jr., Fett-Conte AC. Clonal monosomy of chromosome 21 in a case of myelodysplastic syndrome. *Genet Mol Res* 2011;10:2718-20.
9. Cabanillas F, Pathak S, Zander A, et al. Monosomy 21, partial duplication of chromosome 11, and structural abnormality of chromosome 1q21 in a case of lymphoma developing in a transplant recipient: characteristic abnormalities of secondary lymphoma? *Cancer Genet Cytogenet* 1987;24:7-10.
10. Cuneo A, Roberti MG, Bigoni R, et al. Four novel non-random chromosome rearrangements in B-cell chronic lymphocytic leukaemia: 6p24-25 and 12p12-13 translocations, 4q21 anomalies and monosomy 21. *Br J Haematol* 2000;108:559-64.
11. Dagleish R, Duckett DP, Woodhouse M, Shannon RS, Young ID. Apparent monosomy 21 owing to a ring 21 chromosome: parental origin revealed by DNA analysis. *J Med Genet* 1988;25:851-4.
