# Supplementary material
Source: PubMed Central journal article supplement (PMC3986350)
Supplement: NIHMS529638-supplement-Supp_Table_S1-S6.pdf [file NIHMS529638-supplement-Supp_Table_S1-S6.pdf]

## **Supporting Information: Supporting Tables**

**Babushok et al.** Single Nucleotide Polymorphism Array Analysis of Bone Marrow Failure Patients Reveals Characteristic Patterns of Genetic Changes

**Corresponding Author:** Daria Babushok; Email: [daria.babushok@uphs.upenn.edu](mailto:daria.babushok@uphs.upenn.edu)

### **Contents:**

**Page 1:** Table of Contents

**Page 2:** Supporting Table 1. Breakdown of SNP-A Genotyping by Diagnosis, Number of Arrays and the SNP-A Platform

**Page 3:** Supporting Table 2. Inherited Regions of Extended Homozygosity in BMFS

**Page 4:** Supporting Table 3A. Enrichment Analysis of Copy Number Variants in Neutropenia NOS Patients Compared to Normal Controls (Quad 610 SNP Array, Caucasian)

**Page 6:** Supporting Table 3B. Enrichment Analysis of Copy Number Variants in Acquired Aplastic Anemia Patients Compared to Normal Controls (Quad 610 SNP Array, Caucasian)

**Page 7:** Supporting Table 3C. Enrichment Analysis of Copy Number Variants in Neutropenia NOS Patients Compared to Normal Controls (Omni1-Quad SNP Array, Caucasian)

**Page 9:** Supporting Table 3D. Enrichment Analysis of Copy Number Variants in Acquired Aplastic Anemia Patients Compared to Normal Controls (Omni1-Quad SNP Array, Caucasian)

**Page 11:** Supporting Table 4. Targeted Analysis of Genes Implicated in BMFS and Hematologic Malignancies.

**Page 12:** Supporting Table 5. Comparison of Clinical Information Provided by SNP Array and Metaphase Cytogenetics

**Page 13:** Supporting Table 6. Comparison of Acquired CN-LOH Frequencies in aAA Versus non-aAA BMFS in Published Studies of SNP-A Genotyping in BMFS

**Supporting Table 1. Breakdown of SNP-A Genotyping by Diagnosis, Number of Arrays and the SNP-A Platform**

| Diagnostic Group               | Number of Patients (n=91) | Patients with One Array | Patients with Two Arrays | Patients with Three Arrays | Patients with Four Arrays | Number of Patients (Quad610) <sup>1</sup> | Number of Patients (Omni1) <sup>2</sup> |
|--------------------------------|---------------------------|-------------------------|--------------------------|----------------------------|---------------------------|-------------------------------------------|-----------------------------------------|
| Aplastic Anemia                | 23                        | 16                      | 4                        | 2                          | 1                         | 11                                        | 13                                      |
| Aplastic Anemia with PNH Clone | 8                         | 6                       | 2                        | 0                          | 0                         | 3                                         | 7                                       |
| Diamond-Blackfan Anemia        | 3                         | 2                       | 1                        | 0                          | 0                         | 3                                         | 0                                       |
| Dyskeratosis Congenita         | 6                         | 6                       | 0                        | 0                          | 0                         | 1                                         | 5                                       |
| Fanconi Anemia                 | 3                         | 2                       | 1                        | 0                          | 0                         | 2                                         | 2                                       |
| Shwachman-Diamond Syndrome     | 4                         | 1                       | 2                        | 1                          | 0                         | 3                                         | 3                                       |
| Severe Congenital Neutropenia  | 1                         | 0                       | 1                        | 0                          | 0                         | 1                                         | 1                                       |
| Myelodysplastic Syndrome       | 4                         | 3                       | 1                        | 0                          | 0                         | 3                                         | 1                                       |
| Anemia NOS                     | 5                         | 4                       | 0                        | 1                          | 0                         | 3                                         | 3                                       |
| Neutropenia NOS                | 14                        | 9                       | 4                        | 1                          | 0                         | 9                                         | 10                                      |
| Bone Marrow Failure NOS        | 12                        | 10                      | 1                        | 1                          | 0                         | 6                                         | 7                                       |
| Other                          | 8                         | 7                       | 1                        | 0                          | 0                         | 6                                         | 2                                       |
| Subtotal                       | 91                        | 66                      | 18                       | 6                          | 1                         | 51                                        | 54                                      |

<sup>1</sup> Number of patients genotyped with Human Quad610 SNP Array.

<sup>2</sup> Number of patients genotyped with Human Omni1-Quad SNP Array

Supporting Table 2. Inherited Regions of Extended Homozygosity in BMFS\*

| Patient Number | Diagnosis      | Chr | # of SNPs | Start <sup>1</sup> | End <sup>1</sup> | Length (Mb) | Gene Number | Selected Genes In Region                                             |
|----------------|----------------|-----|-----------|--------------------|------------------|-------------|-------------|----------------------------------------------------------------------|
| 346.01         | NeutropeniaNOS | 1   | 1383      | 167,642,494        | 174,605,170      | 7.0         | 84          | <i>FASLG, PIGC, TNF</i> superfamily                                  |
| 344.01         | NeutropeniaNOS | 5   | 959       | 126,938,115        | 132,673,660      | 5.7         | 43          | <i>CSF2, IL3, IL4, IL5, IL13, UQCRCQ, RAD50, AFF4</i>                |
| 274.01         | AA             | 8   | 1115      | 74,306,675         | 80,691,801       | 6.4         | 23          | <i>IL7, LY96,</i>                                                    |
| 145.01         | AAPNH          | 10  | 4908      | 90,053,738         | 100,189,076      | 10.1        | 114         | <i>CYP26C1, CYP2C19, CYP2C9, CYP2C8, CYP26A1, CYP2C18, DNNT, FAS</i> |
| 328.01         | DC             | 11  | 5708      | 54,697,347         | 69,193,514       | 14.5        | 357         | <i>RAD9A, RPS6KB2, MEN1, MAP4K2, MAP3K11, FOSL1</i>                  |
| 281.01         | AA             | 13  | 3097      | 48,734,519         | 60,224,565       | 11.5        | 66          | <i>RB1, CYSLTR2, LECT1, DHRS12, SETDB2</i>                           |
| 049.01         | SCN            | 14  | 1393      | 26,403,059         | 33,625,685       | 7.2         | 23          | <i>PRKD1, NUBPL, G2E3</i>                                            |
| 368.01         | BMFNOS         | X   | 943       | 70,479,791         | 80,186,893       | 9.7         | 73          | <i>ATRX, COX7B, ERCC6L, FGF16, HDAC8, XIST, TAF1, RPS4X</i>          |
| 162.01         | MDS            | X   | 371       | 70,886,761         | 78,002,855       | 7.1         | 58          | <i>FGF16, HDAC8, ERCC6L, XIST</i>                                    |

\* Patients with consanguinity are excluded. <sup>1</sup>All chromosome coordinates are based on hg19 (NCBI build 37).

**Supporting Table 3A. Enrichment Analysis of Copy Number Variants in Neutropenia NOS Patients Compared to Normal Controls (Quad 610 SNP Array, Caucasian)**

| Gene          | Number of Patients With CNV | Number of Controls With CNV | Total Number of Patients | Total Number of Controls | CNV type   | OR          | p-value*        | Bonferroni p-value |
|---------------|-----------------------------|-----------------------------|--------------------------|--------------------------|------------|-------------|-----------------|--------------------|
| <b>GTF2H2</b> | <b>3</b>                    | <b>12</b>                   | <b>8</b>                 | <b>712</b>               | <b>del</b> | <b>35.7</b> | <b>4.00E-04</b> | <b>3.80E-02</b>    |
| NAIP          | 3                           | 15                          | 8                        | 712                      | del        | 28.6        | 7.00E-04        | 6.65E-02           |
| TKTL1         | 4                           | 37                          | 8                        | 712                      | dup        | 18.0        | 5.00E-04        | 4.75E-02           |
| TEX28         | 4                           | 37                          | 8                        | 712                      | dup        | 18.0        | 5.00E-04        | 4.75E-02           |
| OPN1MW2       | 4                           | 43                          | 8                        | 712                      | dup        | 15.4        | 9.00E-04        | 8.55E-02           |
| OPN1MW        | 4                           | 43                          | 8                        | 712                      | dup        | 15.4        | 9.00E-04        | 8.55E-02           |
| OPN1LW        | 4                           | 43                          | 8                        | 712                      | dup        | 15.4        | 9.00E-04        | 8.55E-02           |
| LOC647859     | 2                           | 10                          | 8                        | 712                      | del        | 25.7        | 0.0068          | 6.46E-01           |
| CDRT7         | 1                           | 0                           | 8                        | 712                      | del        | 285.0       | 0.0111          | 1                  |
| MGC12916      | 1                           | 0                           | 8                        | 712                      | del        | 285.0       | 0.0111          | 1                  |
| COX10         | 1                           | 0                           | 8                        | 712                      | del        | 285.0       | 0.0111          | 1                  |
| MIR4731       | 1                           | 0                           | 8                        | 712                      | del        | 285.0       | 0.0111          | 1                  |
| SLC7A9        | 1                           | 0                           | 8                        | 712                      | del        | 285.0       | 0.0111          | 1                  |
| PMP22         | 1                           | 0                           | 8                        | 712                      | del        | 285.0       | 0.0111          | 1                  |
| CDRT4         | 1                           | 0                           | 8                        | 712                      | del        | 285.0       | 0.0111          | 1                  |
| TVP23C        | 1                           | 0                           | 8                        | 712                      | del        | 285.0       | 0.0111          | 1                  |
| GMDS          | 1                           | 0                           | 8                        | 712                      | del        | 285.0       | 0.0111          | 1                  |
| CEP89         | 1                           | 0                           | 8                        | 712                      | del        | 285.0       | 0.0111          | 1                  |
| HS3ST3B1      | 1                           | 0                           | 8                        | 712                      | del        | 285.0       | 0.0111          | 1                  |
| FAM82A1       | 1                           | 0                           | 8                        | 712                      | del        | 285.0       | 0.0111          | 1                  |
| TEKT3         | 1                           | 0                           | 8                        | 712                      | del        | 285.0       | 0.0111          | 1                  |
| CDRT15        | 1                           | 0                           | 8                        | 712                      | del        | 285.0       | 0.0111          | 1                  |
| TVP23C-CDRT4  | 1                           | 0                           | 8                        | 712                      | del        | 285.0       | 0.0111          | 1                  |
| FOXC2         | 1                           | 0                           | 8                        | 712                      | dup        | 285.0       | 0.0111          | 1                  |
| LOC100616530  | 1                           | 0                           | 8                        | 712                      | dup        | 285.0       | 0.0111          | 1                  |
| MTHFSD        | 1                           | 0                           | 8                        | 712                      | dup        | 285.0       | 0.0111          | 1                  |
| LOC732275     | 1                           | 0                           | 8                        | 712                      | dup        | 285.0       | 0.0111          | 1                  |
| FOXF1         | 1                           | 0                           | 8                        | 712                      | dup        | 285.0       | 0.0111          | 1                  |
| FLJ30679      | 1                           | 0                           | 8                        | 712                      | dup        | 285.0       | 0.0111          | 1                  |
| LOC146513     | 1                           | 0                           | 8                        | 712                      | dup        | 285.0       | 0.0111          | 1                  |
| FOXF1-AS1     | 1                           | 0                           | 8                        | 712                      | dup        | 285.0       | 0.0111          | 1                  |
| MTBP          | 1                           | 0                           | 8                        | 712                      | dup        | 285.0       | 0.0111          | 1                  |
| FOXL1         | 1                           | 0                           | 8                        | 712                      | dup        | 285.0       | 0.0111          | 1                  |
| IRF8          | 1                           | 0                           | 8                        | 712                      | dup        | 285.0       | 0.0111          | 1                  |
| SNTB1         | 1                           | 0                           | 8                        | 712                      | dup        | 285.0       | 0.0111          | 1                  |
| TFB2M         | 1                           | 0                           | 8                        | 712                      | dup        | 285.0       | 0.0111          | 1                  |
| CNST          | 1                           | 0                           | 8                        | 712                      | dup        | 285.0       | 0.0111          | 1                  |

|                 |   |   |   |     |     |      |        |   |
|-----------------|---|---|---|-----|-----|------|--------|---|
| <i>NEO1</i>     | 1 | 1 | 8 | 712 | del | 94.9 | 0.0221 | 1 |
| <i>FOXP2</i>    | 1 | 1 | 8 | 712 | del | 94.9 | 0.0221 | 1 |
| <i>METTL9</i>   | 1 | 1 | 8 | 712 | dup | 94.9 | 0.0221 | 1 |
| <i>OTOA</i>     | 1 | 1 | 8 | 712 | dup | 94.9 | 0.0221 | 1 |
| <i>IGSF6</i>    | 1 | 1 | 8 | 712 | dup | 94.9 | 0.0221 | 1 |
| <i>PKD1L2</i>   | 1 | 2 | 8 | 712 | del | 56.8 | 0.033  | 1 |
| <i>CNTNAP3B</i> | 1 | 4 | 8 | 712 | del | 31.5 | 0.0545 | 1 |
| <i>TXLNB</i>    | 1 | 4 | 8 | 712 | del | 31.5 | 0.0545 | 1 |
| <i>SSX6</i>     | 1 | 4 | 8 | 712 | del | 31.5 | 0.0545 | 1 |
| <i>AADAC</i>    | 1 | 5 | 8 | 712 | del | 25.7 | 0.0651 | 1 |
| <i>MIR548H2</i> | 1 | 5 | 8 | 712 | del | 25.7 | 0.0651 | 1 |
| <i>ZNF630</i>   | 1 | 5 | 8 | 712 | del | 25.7 | 0.0651 | 1 |

\*Only CNVs with unadjusted p-value <0.10 are shown.

**Supporting Table 3B. Enrichment Analysis of Copy Number Variants in Acquired Aplastic Anemia Patients Compared to Normal Controls (Quad 610 SNP Array, Caucasian)**

| Gene       | Number of Patients With CNV | Number of Controls With CNV | Total Number of Patients | Total Number of Controls | CNV type | OR    | p-value* | Bonferroni p-value |
|------------|-----------------------------|-----------------------------|--------------------------|--------------------------|----------|-------|----------|--------------------|
| TKTL1      | 3                           | 37                          | 8                        | 712                      | dup      | 11.5  | 0.0073   | 0.5183             |
| TEX28      | 3                           | 37                          | 8                        | 712                      | dup      | 11.5  | 0.0073   | 0.5183             |
| OPN1MW2    | 3                           | 43                          | 8                        | 712                      | dup      | 9.8   | 0.0109   | 0.7739             |
| OPN1MW     | 3                           | 43                          | 8                        | 712                      | dup      | 9.8   | 0.0109   | 0.7739             |
| OPN1LW     | 3                           | 43                          | 8                        | 712                      | dup      | 9.8   | 0.0109   | 0.7739             |
| TARP       | 1                           | 0                           | 8                        | 712                      | del      | 285.0 | 0.0111   | 0.7881             |
| BAI3       | 1                           | 0                           | 8                        | 712                      | dup      | 285.0 | 0.0111   | 0.7881             |
| EXOC4      | 1                           | 1                           | 8                        | 712                      | del      | 94.9  | 0.0221   | 1                  |
| LOC401134  | 1                           | 1                           | 8                        | 712                      | del      | 94.9  | 0.0221   | 1                  |
| SNRPN      | 1                           | 1                           | 8                        | 712                      | del      | 94.9  | 0.0221   | 1                  |
| ANKRD30BP2 | 1                           | 1                           | 8                        | 712                      | dup      | 94.9  | 0.0221   | 1                  |
| ABCC4      | 1                           | 1                           | 8                        | 712                      | dup      | 94.9  | 0.0221   | 1                  |
| ERC1       | 1                           | 2                           | 8                        | 712                      | del      | 56.8  | 0.033    | 1                  |
| OPCML      | 1                           | 3                           | 8                        | 712                      | del      | 40.5  | 0.0438   | 1                  |
| LRR37A2    | 1                           | 3                           | 8                        | 712                      | dup      | 40.5  | 0.0438   | 1                  |
| NSF        | 1                           | 3                           | 8                        | 712                      | dup      | 40.5  | 0.0438   | 1                  |
| NSFP1      | 1                           | 3                           | 8                        | 712                      | dup      | 40.5  | 0.0438   | 1                  |
| AADAC      | 1                           | 5                           | 8                        | 712                      | del      | 25.7  | 0.0651   | 1                  |
| MIR548H2   | 1                           | 5                           | 8                        | 712                      | del      | 25.7  | 0.0651   | 1                  |
| UGT2B28    | 1                           | 7                           | 8                        | 712                      | del      | 18.8  | 0.0859   | 1                  |
| NKAIN2     | 1                           | 7                           | 8                        | 712                      | dup      | 18.8  | 0.0859   | 1                  |
| ARL17B     | 1                           | 8                           | 8                        | 712                      | dup      | 16.6  | 0.0962   | 1                  |
| ARL17A     | 1                           | 8                           | 8                        | 712                      | dup      | 16.6  | 0.0962   | 1                  |

\*Only CNVs with unadjusted p-value <0.10 are shown.

**Supporting Table 3C. Enrichment Analysis of Copy Number Variants in Neutropenia NOS Patients Compared to Normal Controls (Omni1-Quad SNP Array, Caucasian)**

| Gene             | Number of Patients With CNV | Number of Controls With CNV | Total Number of Patients | Total Number of Controls | CNV type | OR    | p-value* | Bonferroni p-value |
|------------------|-----------------------------|-----------------------------|--------------------------|--------------------------|----------|-------|----------|--------------------|
| <i>SBNO2</i>     | 10                          | 3                           | 10                       | 89                       | del      | 519.0 | 1.84E-11 | 1.06E-08           |
| <i>ZNF516</i>    | 8                           | 8                           | 10                       | 89                       | del      | 32.6  | 2.87E-06 | 1.65E-03           |
| <i>MTMR3</i>     | 3                           | 0                           | 10                       | 89                       | dup      | 83.5  | 8.00E-04 | 4.60E-01           |
| <i>MSI2</i>      | 9                           | 30                          | 10                       | 89                       | del      | 12.4  | 9.00E-04 | 5.18E-01           |
| <i>PCSK5</i>     | 4                           | 4                           | 10                       | 89                       | del      | 13.2  | 0.0032   | 1                  |
| <i>NXN</i>       | 3                           | 2                           | 10                       | 89                       | dup      | 16.3  | 0.0068   | 1                  |
| <i>LOC283683</i> | 3                           | 2                           | 10                       | 89                       | del      | 16.3  | 0.0068   | 1                  |
| <i>ALDH1A3</i>   | 2                           | 0                           | 10                       | 89                       | dup      | 52.6  | 0.0093   | 1                  |
| <i>EVI2A</i>     | 2                           | 0                           | 10                       | 89                       | del      | 52.6  | 0.0093   | 1                  |
| <i>RPS6KA2</i>   | 2                           | 0                           | 10                       | 89                       | del      | 52.6  | 0.0093   | 1                  |
| <i>NF1</i>       | 2                           | 0                           | 10                       | 89                       | del      | 52.6  | 0.0093   | 1                  |
| <i>TCF3</i>      | 5                           | 12                          | 10                       | 89                       | del      | 6.2   | 0.0123   | 1                  |
| <i>HCN1</i>      | 4                           | 7                           | 10                       | 89                       | del      | 7.6   | 0.0127   | 1                  |
| <i>BCR</i>       | 4                           | 8                           | 10                       | 89                       | del      | 6.6   | 0.0181   | 1                  |
| <i>SHISA9</i>    | 3                           | 4                           | 10                       | 89                       | del      | 8.9   | 0.0214   | 1                  |
| <i>ADAP1</i>     | 2                           | 1                           | 10                       | 89                       | dup      | 17.4  | 0.0263   | 1                  |
| <i>MASP2</i>     | 2                           | 1                           | 10                       | 89                       | del      | 17.4  | 0.0263   | 1                  |
| <i>FCGR1C</i>    | 2                           | 1                           | 10                       | 89                       | del      | 17.4  | 0.0263   | 1                  |
| <i>DOCK5</i>     | 9                           | 48                          | 10                       | 89                       | del      | 5.4   | 0.027    | 1                  |
| <i>KCNMB2</i>    | 8                           | 38                          | 10                       | 89                       | del      | 4.5   | 0.0271   | 1                  |
| <i>SDK1</i>      | 6                           | 22                          | 10                       | 89                       | del      | 4.3   | 0.0284   | 1                  |
| <i>TRAK2</i>     | 4                           | 10                          | 10                       | 89                       | del      | 5.2   | 0.0327   | 1                  |
| <i>DMD</i>       | 5                           | 16                          | 10                       | 89                       | del      | 4.5   | 0.0332   | 1                  |
| <i>TMTC1</i>     | 3                           | 6                           | 10                       | 89                       | del      | 6.0   | 0.0457   | 1                  |
| <i>TSC22D1</i>   | 3                           | 6                           | 10                       | 89                       | del      | 6.0   | 0.0457   | 1                  |
| <i>UGT2B15</i>   | 2                           | 2                           | 10                       | 89                       | dup      | 10.3  | 0.0497   | 1                  |
| <i>AMY1B</i>     | 2                           | 2                           | 10                       | 89                       | dup      | 10.3  | 0.0497   | 1                  |
| <i>AMY1A</i>     | 2                           | 2                           | 10                       | 89                       | dup      | 10.3  | 0.0497   | 1                  |
| <i>AMY1C</i>     | 2                           | 2                           | 10                       | 89                       | dup      | 10.3  | 0.0497   | 1                  |
| <i>EMR3</i>      | 5                           | 18                          | 10                       | 89                       | del      | 3.9   | 0.0494   | 1                  |
| <i>VGLL4</i>     | 5                           | 18                          | 10                       | 89                       | del      | 3.9   | 0.0494   | 1                  |
| <i>STON2</i>     | 2                           | 2                           | 10                       | 89                       | del      | 10.3  | 0.0497   | 1                  |
| <i>DCDC2</i>     | 4                           | 12                          | 10                       | 89                       | del      | 4.3   | 0.0532   | 1                  |
| <i>TGFBR3</i>    | 6                           | 26                          | 10                       | 89                       | del      | 3.5   | 0.0566   | 1                  |
| <i>LOC440970</i> | 3                           | 7                           | 10                       | 89                       | del      | 5.1   | 0.0616   | 1                  |
| <i>LOC285441</i> | 4                           | 13                          | 10                       | 89                       | del      | 3.9   | 0.0658   | 1                  |
| <i>WNK1</i>      | 5                           | 20                          | 10                       | 89                       | del      | 3.4   | 0.0702   | 1                  |

|                  |   |    |    |    |     |     |        |   |
|------------------|---|----|----|----|-----|-----|--------|---|
| <i>PTPRD</i>     | 9 | 55 | 10 | 89 | del | 3.9 | 0.0716 | 1 |
| <i>CFH</i>       | 2 | 3  | 10 | 89 | dup | 7.3 | 0.0783 | 1 |
| <i>FAM211A</i>   | 2 | 3  | 10 | 89 | dup | 7.3 | 0.0783 | 1 |
| <i>AMY2A</i>     | 2 | 3  | 10 | 89 | dup | 7.3 | 0.0783 | 1 |
| <i>LRRC27</i>    | 2 | 3  | 10 | 89 | del | 7.3 | 0.0783 | 1 |
| <i>LOC388692</i> | 2 | 3  | 10 | 89 | del | 7.3 | 0.0783 | 1 |
| <i>CROCC</i>     | 2 | 3  | 10 | 89 | del | 7.3 | 0.0783 | 1 |
| <i>AGRN</i>      | 3 | 8  | 10 | 89 | del | 4.5 | 0.0799 | 1 |
| <i>SEMA3E</i>    | 4 | 14 | 10 | 89 | del | 3.6 | 0.08   | 1 |

\*Only CNVs with unadjusted p-value <0.10 are shown.



**Supporting Table 3D. Enrichment Analysis of Copy Number Variants in Acquired Aplastic Anemia Patients Compared to Normal Controls (Omni1-Quad SNP Array, Caucasian)**

| Gene         | Number of Patients With CNV | Number of Controls With CNV | Total Number of Patients | Total Number of Controls | CNV type | OR          | p-value*        | Bonferroni p-value |
|--------------|-----------------------------|-----------------------------|--------------------------|--------------------------|----------|-------------|-----------------|--------------------|
| <b>SBNO2</b> | <b>8</b>                    | <b>3</b>                    | <b>12</b>                | <b>89</b>                | del      | <b>46.7</b> | <b>3.59E-07</b> | <b>0.000243137</b> |
| B4GALNT3     | 4                           | 0                           | 12                       | 89                       | del      | 94.8        | 1.00E-04        | 0.0677             |
| EXT1         | 8                           | 13                          | 12                       | 89                       | del      | 10.7        | 3.00E-04        | 0.2031             |
| MYO16        | 10                          | 25                          | 12                       | 89                       | del      | 10.6        | 4.00E-04        | 0.2708             |
| KRT16P1      | 5                           | 4                           | 12                       | 89                       | del      | 13.9        | 0.001           | 0.677              |
| LOC339240    | 5                           | 4                           | 12                       | 89                       | del      | 13.9        | 0.001           | 0.677              |
| MTMR3        | 3                           | 0                           | 12                       | 89                       | dup      | 65.9        | 0.0013          | 0.8801             |
| JARID2       | 3                           | 0                           | 12                       | 89                       | del      | 65.9        | 0.0013          | 0.8801             |
| SEMA4D       | 3                           | 0                           | 12                       | 89                       | del      | 65.9        | 0.0013          | 0.8801             |
| LOC283683    | 4                           | 2                           | 12                       | 89                       | del      | 18.5        | 0.0016          | 1                  |
| SEMA3E       | 7                           | 14                          | 12                       | 89                       | del      | 7.1         | 0.0026          | 1                  |
| CFH          | 4                           | 3                           | 12                       | 89                       | dup      | 13.1        | 0.0035          | 1                  |
| MAD1L1       | 5                           | 7                           | 12                       | 89                       | del      | 8.1         | 0.0051          | 1                  |
| EEF1DP3      | 4                           | 4                           | 12                       | 89                       | del      | 10.1        | 0.0064          | 1                  |
| ZNF516       | 5                           | 8                           | 12                       | 89                       | del      | 7.0         | 0.0077          | 1                  |
| KCNMB2       | 10                          | 38                          | 12                       | 89                       | del      | 5.6         | 0.0086          | 1                  |
| LINC00616    | 6                           | 13                          | 12                       | 89                       | del      | 5.7         | 0.0092          | 1                  |
| TJP2         | 10                          | 39                          | 12                       | 89                       | del      | 5.4         | 0.0105          | 1                  |
| NXN          | 3                           | 2                           | 12                       | 89                       | dup      | 12.9        | 0.0114          | 1                  |
| LOC649352    | 3                           | 2                           | 12                       | 89                       | dup      | 12.9        | 0.0114          | 1                  |
| FAM66A       | 3                           | 2                           | 12                       | 89                       | dup      | 12.9        | 0.0114          | 1                  |
| ZFHX4-AS1    | 2                           | 0                           | 12                       | 89                       | del      | 42.6        | 0.0131          | 1                  |
| RUNDC3B      | 2                           | 0                           | 12                       | 89                       | del      | 42.6        | 0.0131          | 1                  |
| MDGA2        | 2                           | 0                           | 12                       | 89                       | del      | 42.6        | 0.0131          | 1                  |
| DLGAP2       | 2                           | 0                           | 12                       | 89                       | del      | 42.6        | 0.0131          | 1                  |
| SERINC2      | 2                           | 0                           | 12                       | 89                       | del      | 42.6        | 0.0131          | 1                  |
| ABCB1        | 2                           | 0                           | 12                       | 89                       | del      | 42.6        | 0.0131          | 1                  |
| NDUFA12      | 2                           | 0                           | 12                       | 89                       | del      | 42.6        | 0.0131          | 1                  |
| ZNF554       | 2                           | 0                           | 12                       | 89                       | del      | 42.6        | 0.0131          | 1                  |
| TRPM2        | 2                           | 0                           | 12                       | 89                       | del      | 42.6        | 0.0131          | 1                  |
| LOC727849    | 2                           | 0                           | 12                       | 89                       | del      | 42.6        | 0.0131          | 1                  |
| LOC440297    | 2                           | 0                           | 12                       | 89                       | del      | 42.6        | 0.0131          | 1                  |
| TGFBR3       | 8                           | 26                          | 12                       | 89                       | del      | 4.5         | 0.014           | 1                  |
| SMAD1        | 10                          | 42                          | 12                       | 89                       | del      | 4.7         | 0.0183          | 1                  |
| FGF12        | 6                           | 16                          | 12                       | 89                       | del      | 4.5         | 0.0211          | 1                  |
| GALNT9       | 3                           | 3                           | 12                       | 89                       | del      | 9.1         | 0.0213          | 1                  |
| MGAM         | 8                           | 29                          | 12                       | 89                       | del      | 3.9         | 0.0256          | 1                  |
| LGALS9C      | 5                           | 12                          | 12                       | 89                       | del      | 4.5         | 0.0283          | 1                  |

|                   |   |    |    |    |     |      |        |   |
|-------------------|---|----|----|----|-----|------|--------|---|
| <i>ACTG1P4</i>    | 3 | 4  | 12 | 89 | dup | 7.0  | 0.0347 | 1 |
| <i>CXADRP2</i>    | 3 | 4  | 12 | 89 | dup | 7.0  | 0.0347 | 1 |
| <i>LOC646214</i>  | 3 | 4  | 12 | 89 | dup | 7.0  | 0.0347 | 1 |
| <i>AMY2B</i>      | 3 | 4  | 12 | 89 | dup | 7.0  | 0.0347 | 1 |
| <i>BOK</i>        | 4 | 8  | 12 | 89 | del | 5.1  | 0.0344 | 1 |
| <i>CTNNA3</i>     | 3 | 4  | 12 | 89 | del | 7.0  | 0.0347 | 1 |
| <i>SLC24A2</i>    | 3 | 4  | 12 | 89 | del | 7.0  | 0.0347 | 1 |
| <i>GALNTL2</i>    | 5 | 13 | 12 | 89 | del | 4.2  | 0.0366 | 1 |
| <i>SERF1A</i>     | 2 | 1  | 12 | 89 | del | 14.0 | 0.0366 | 1 |
| <i>SERF1B</i>     | 2 | 1  | 12 | 89 | del | 14.0 | 0.0366 | 1 |
| <i>PKHD1</i>      | 9 | 39 | 12 | 89 | del | 3.5  | 0.0416 | 1 |
| <i>ACOT11</i>     | 8 | 32 | 12 | 89 | del | 3.3  | 0.0433 | 1 |
| <i>CRCP</i>       | 4 | 9  | 12 | 89 | del | 4.5  | 0.0462 | 1 |
| <i>LOC646762</i>  | 4 | 9  | 12 | 89 | del | 4.5  | 0.0462 | 1 |
| <i>FAM35B2</i>    | 3 | 5  | 12 | 89 | dup | 5.7  | 0.0516 | 1 |
| <i>FLJ43860</i>   | 3 | 5  | 12 | 89 | del | 5.7  | 0.0516 | 1 |
| <i>AK8</i>        | 3 | 5  | 12 | 89 | del | 5.7  | 0.0516 | 1 |
| <i>TRAK2</i>      | 4 | 10 | 12 | 89 | del | 4.0  | 0.0603 | 1 |
| <i>LOC439994</i>  | 2 | 2  | 12 | 89 | dup | 8.3  | 0.0682 | 1 |
| <i>RNF212</i>     | 2 | 2  | 12 | 89 | dup | 8.3  | 0.0682 | 1 |
| <i>BMS1P1</i>     | 3 | 6  | 12 | 89 | dup | 4.7  | 0.072  | 1 |
| <i>BMS1P5</i>     | 3 | 6  | 12 | 89 | dup | 4.7  | 0.072  | 1 |
| <i>POTEB</i>      | 3 | 6  | 12 | 89 | dup | 4.7  | 0.072  | 1 |
| <i>NF1P2</i>      | 3 | 6  | 12 | 89 | dup | 4.7  | 0.072  | 1 |
| <i>GLUD1P7</i>    | 3 | 6  | 12 | 89 | dup | 4.7  | 0.072  | 1 |
| <i>PPFIA2</i>     | 7 | 28 | 12 | 89 | del | 2.9  | 0.0677 | 1 |
| <i>LINGO2</i>     | 7 | 28 | 12 | 89 | del | 2.9  | 0.0677 | 1 |
| <i>POU4F1-AS1</i> | 2 | 2  | 12 | 89 | del | 8.3  | 0.0682 | 1 |
| <i>MIR1233-2</i>  | 2 | 2  | 12 | 89 | del | 8.3  | 0.0682 | 1 |
| <i>LOC401164</i>  | 2 | 2  | 12 | 89 | del | 8.3  | 0.0682 | 1 |
| <i>DACT2</i>      | 2 | 2  | 12 | 89 | del | 8.3  | 0.0682 | 1 |
| <i>SMN2</i>       | 2 | 2  | 12 | 89 | del | 8.3  | 0.0682 | 1 |
| <i>SMN1</i>       | 2 | 2  | 12 | 89 | del | 8.3  | 0.0682 | 1 |
| <i>MIR1233-1</i>  | 2 | 2  | 12 | 89 | del | 8.3  | 0.0682 | 1 |
| <i>EDARADD</i>    | 2 | 2  | 12 | 89 | del | 8.3  | 0.0682 | 1 |
| <i>TCERG1L</i>    | 8 | 35 | 12 | 89 | del | 2.9  | 0.0692 | 1 |
| <i>PDGFD</i>      | 5 | 16 | 12 | 89 | del | 3.3  | 0.0705 | 1 |
| <i>TSC22D1</i>    | 3 | 6  | 12 | 89 | del | 4.7  | 0.072  | 1 |
| <i>MOB2</i>       | 3 | 6  | 12 | 89 | del | 4.7  | 0.072  | 1 |
| <i>GRID2</i>      | 4 | 11 | 12 | 89 | del | 3.6  | 0.0765 | 1 |
| <i>MSI2</i>       | 7 | 30 | 12 | 89 | del | 2.7  | 0.0914 | 1 |

\*Only CNVs with unadjusted p-value <0.10 are shown.

Supporting Table 4. Targeted Analysis of Genes Implicated in BMFS and Hematologic Malignancies.

| Pathogenic Variants              |                            |                         |                   |                                                                                       |
|----------------------------------|----------------------------|-------------------------|-------------------|---------------------------------------------------------------------------------------|
| Gene                             | Diagnostic Group           | Patients Affected/Total | Abnormality       | Significance                                                                          |
| <i>FANCA</i>                     | Fanconi Anemia             | 2/4                     | CN-LOH            | Unmasked recessive <i>FANCA</i> mutation                                              |
| <i>SBDS</i>                      | Shwachman Diamond Syndrome | 1/4                     | CN-LOH            | Gene conversion selecting for a hypomorphic <i>SBDS</i> allele                        |
| <i>CBL</i>                       | Other                      | 1/7                     | CN-LOH            | Known oncogenic mutation in <i>CBL</i> underlying 11q CN-LOH acquisition              |
| <i>RUNX1</i>                     | BMFNOS                     | 1/13                    | Het del           | <i>RUNX1</i> haploinsufficiency associated with congenital thrombocytopenia, AML/MDS. |
| <i>FLT3</i>                      | Other (AML)                | 1/7                     | Acquired CN-LOH   | Known oncogenic mutation <i>FLT3</i> ITD underlying 13q CN-LOH acquisition            |
| Variants of Unknown Significance |                            |                         |                   |                                                                                       |
| <i>RTEL1</i>                     | Dyskeratosis Congenita     | 3/6                     | Dup (ex 30-35)    | Unknown significance.                                                                 |
| <i>ATM</i>                       | Other                      | 1/7                     | Acquired CNLOH    | Unknown significance; within a region of acquired 11q CN-LOH.                         |
|                                  | Fanconi Anemia             | 1/4                     | 29 MB CNLOH       | Within a larger region of homozygosity by descent.                                    |
| <i>BRAF</i>                      | MDS                        | 1/4                     | Acquired dup      | Within isochromosome 7; significance unknown.                                         |
|                                  | MDS                        | 1/4                     | Acquired del      | Within monosomy 7; significance unknown.                                              |
| <i>ETV6</i>                      | AA                         | 4/13                    | Intronic deletion | Unknown significance.                                                                 |
|                                  | AAPNH                      | 2/5                     |                   |                                                                                       |
|                                  | BMFNOS                     | 4/8                     |                   |                                                                                       |
|                                  | SDS                        | 3/3                     |                   |                                                                                       |
| <i>EZH2</i>                      | MDS                        | 1/4                     | Acquired dup      | Within isochromosome 7; significance unknown.                                         |
|                                  | MDS                        | 1/4                     | Acquired del      | Within monosomy 7; significance unknown.                                              |
| <i>GATA2</i>                     | Fanconi Anemia             | 1/4                     | 16.1 MB CNLOH     | Within a larger region of homozygosity by descent.                                    |
| <i>GNAS</i>                      | Other                      | 1/7                     | 7.4 MB CNLOH      | Within a larger region of homozygosity by descent.                                    |
| <i>KLHL6</i>                     | Fanconi Anemia             | 1/4                     | 9.1 MB CNLOH      | Within a larger region of homozygosity by descent.                                    |
| <i>SF3B1</i>                     | Other                      | 1/7                     | 15.4 MB CNLOH     | Within a larger region of homozygosity by descent.                                    |
| <i>TERT</i>                      | Fanconi Anemia             | 1/4                     | 7.2 MB CNLOH      | Within a larger region of homozygosity by descent.                                    |

**Supporting Table 5. Comparison of Clinical Information Provided by SNP Array and Metaphase Cytogenetics**

| Cytogenetics (% of Total)    | 610 Quad, n (%) | Omni1, n (%) | Overall, n (%) |
|------------------------------|-----------------|--------------|----------------|
| Normal Cytogenetics (87.9%)  | 57              | 52           | 109            |
| Normal Array                 | 14 (24.6)       | 1 (1.9)      | 15 (13.8)      |
| Abnormal Array               | 43 (75.4)       | 51 (98.1)    | 94 (86.2)      |
| Abnormal Cytogenetics (8.9%) | 9               | 2            | 11             |
| Normal Array                 | 0 (0)           | 0 (0)        | 0 (0)          |
| Abnormal Array               | 9 (100)         | 2 (100)      | 11 (100)       |
| No Cytogenetics (3.2 %)      | 1               | 3            | 4              |
| Normal Array                 | 1 (100)         | 0 (0)        | 1 (0.25)       |
| Abnormal Array               | 0 (0)           | 3 (100)      | 3 (0.75)       |
| <b>Total</b>                 | <b>67</b>       | <b>57</b>    | <b>124</b>     |

**Supporting Table 6. Comparison of Acquired CN-LOH Frequencies in aAA Versus non-aAA BMFS in Published Studies of SNP-A Genotyping in BMFS**

| Publication                             | Patients with acquired CN-LOH (aAA) | Patients With No CN-LOH (aAA) | Patients with acquired CN-LOH (Non-aAA BMFS) | Patients with No CN-LOH (Non-aAA BMFS) | Description of Non-AA BMFS Population                                                                                                                                            |
|-----------------------------------------|-------------------------------------|-------------------------------|----------------------------------------------|----------------------------------------|----------------------------------------------------------------------------------------------------------------------------------------------------------------------------------|
| Katagiri <i>et al.</i> <sup>1</sup>     | 34                                  | 272                           | n/a                                          | n/a                                    | n/a                                                                                                                                                                              |
| Afable <i>et al.</i> <sup>2</sup>       | 7                                   | 86                            | 0                                            | 24                                     | Hypoplastic MDS                                                                                                                                                                  |
| Quentin <i>et al.</i> <sup>3</sup>      | n/a                                 | n/a                           | 1                                            | 31                                     | FA patients genotyped using SNP-A (11 with myelodysplasia, 16 with aplastic marrow, 5 with normal marrow; patients who transformed to leukemia were excluded from this analysis) |
| Current Study<br>Babushok <i>et al.</i> | 6                                   | 25                            | 1                                            | 51                                     | See Table 1, "Other" category excluded                                                                                                                                           |
| <b>Total</b>                            | <b>47</b>                           | <b>383</b>                    | <b>2</b>                                     | <b>106</b>                             |                                                                                                                                                                                  |

**Comparison of acquired CN-LOH in patients with aAA versus non-aAA BMFS: Odds Ratio 6.504, 95% CI: 1.653-56.053, p=0.0022.**

### Supporting References

1. Katagiri T, Sato-Otsubo A, Kashiwase K, et al. Frequent loss of HLA alleles associated with copy number-neutral 6pLOH in acquired aplastic anemia. *Blood* 2011;118:6601-9.
2. Afable MG, 2nd, Wlodarski M, Makishima H, et al. SNP array-based karyotyping: differences and similarities between aplastic anemia and hypocellular myelodysplastic syndromes. *Blood* 2011;117:6876-84.
3. Quentin S, Cuccuini W, Ceccaldi R, et al. Myelodysplasia and leukemia of Fanconi anemia are associated with a specific pattern of genomic abnormalities that includes cryptic RUNX1/AML1 lesions. *Blood* 2011;117:e161-70.
